# Supplementary material for: Generation of mouse ES cell lines engineered for the forced induction of transcription factors
Source: PubMed Central journal article supplement — Sci Rep. 2011 Nov 23;1:167. doi: 10.1038/srep00167 (PMC3240988; doi:10.1038/srep00167), 2011-11-23
Supplement: srep00167-s1.pdf [file srep00167-s1.pdf]

# Supplementary Information

## Generation of mouse ES cell lines engineered for the forced induction of transcription factors

Lina S. Correa-Cerro<sup>1</sup>, Yulan Piao<sup>1</sup>, Alexei A. Sharov<sup>1</sup>, Akira Nishiyama, Jean S. Cadet, Hong Yu, Lioudmila V. Sharova, Li Xin, Hien G. Hoang, Marshall Thomas, Yong Qian, Dawood B. Dudekula, Emily Meyers, Bernard Y. Binder, Gregory Mowrer, Uwem Bassey, Dan L. Longo, David Schlessinger, and Minoru S.H. Ko\*

National Institute on Aging, National Institutes of Health, Baltimore, MD 21224, USA

<sup>1</sup>These authors contributed equally to this work

\*Correspondence and requests for materials should be addressed to M.S.H.K.  
(kom@mail.nih.gov)

**Project Website :** <http://esbank.nia.nih.gov/>

Microarray Data : GEO/NCBI (<http://www.ncbi.nlm.nih.gov/geo>; accession number GSE31381)  
Microarray Data : NIA Array Analysis software (<http://lgsun.grc.nia.nih.gov/ANOVA>)

- Supplementary Figure S1
- Supplementary Table S1
- Supplementary Table S2 (separate file)
- Supplementary Methods

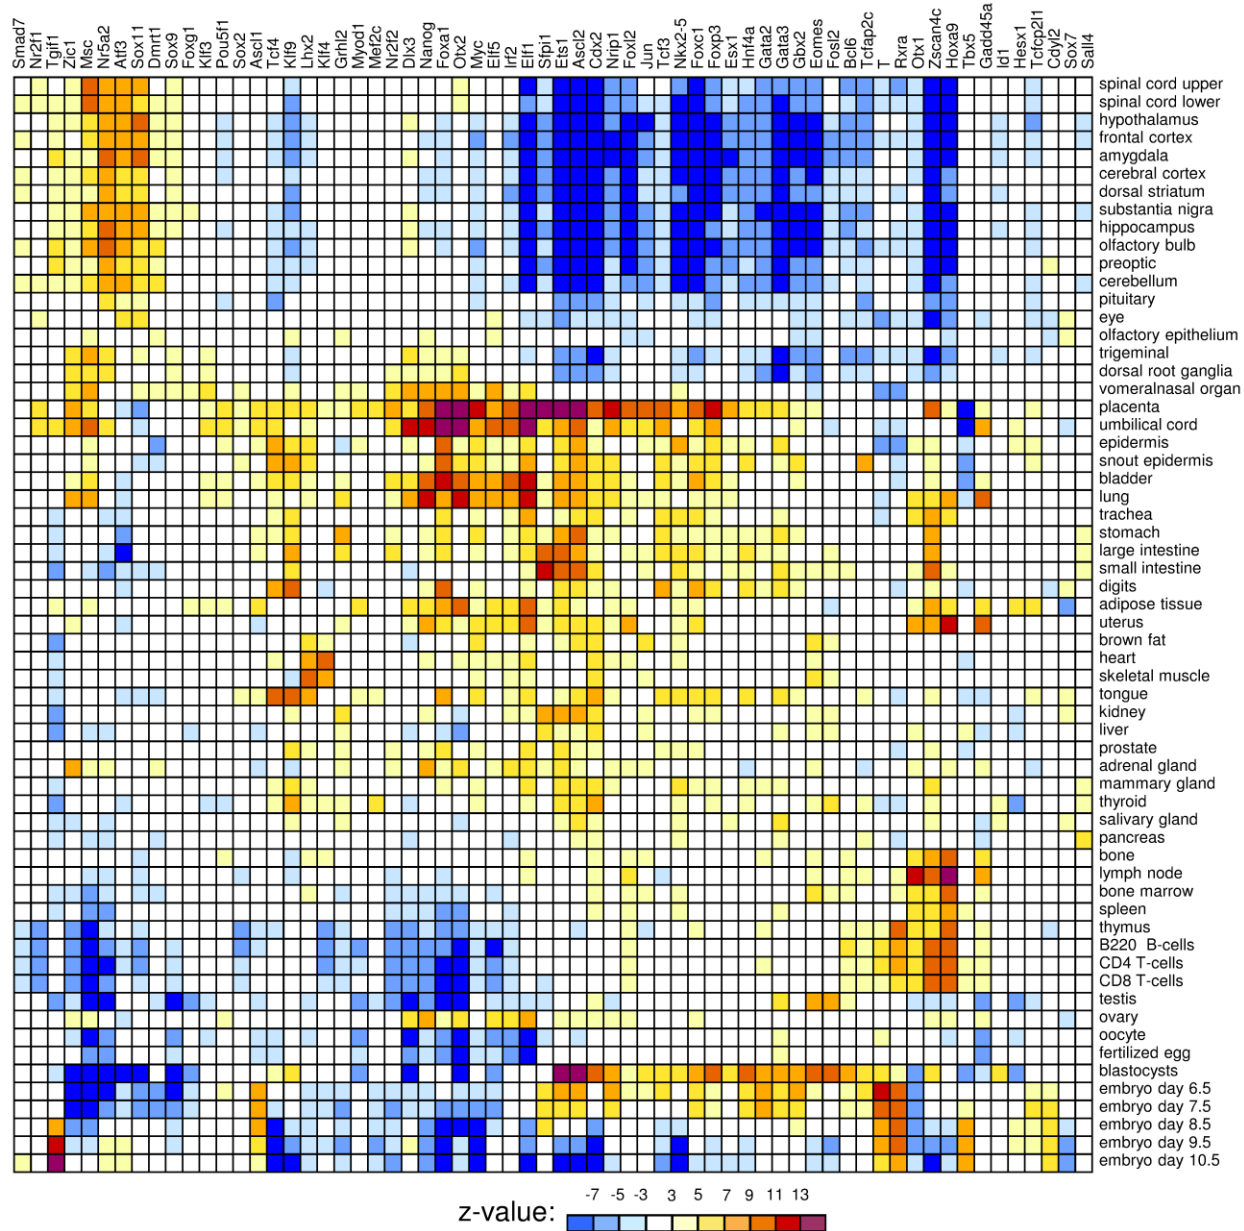

**Supplementary Figure S1.** Correlation of gene expression response to the induction of TFs with tissue-specific gene expression from the GNF ver. 2 database (Su et al. 2002).

**Supplementary Table S1. qPCR primers**

| <b>Gene symbol</b> | <b>Forward</b>                       | <b>Reverse</b>            |
|--------------------|--------------------------------------|---------------------------|
| Aff1               | GAGGCATTTCCCGAGAAGGCTC               | TGGTCTGGATCCGACTTGATAGCTC |
| Ankrd22            | GGATGCTCCTTAATGCTGGCGTAG             | ATGGGCTTCCAGAAGCAGAGGG    |
| Arnt2              | AGATGGCGTCAGACATACCAGGATC            | TTACTGGGACCTTCACCATCTTCG  |
| Ash2l              | AATGGTTCACCGCTGACACCTTTG             | GCACACATTGCAATGGAAGCTGTAG |
| Atxn1              | TGGCCGTGATACAGTTTGCTGTTG             | GGATGACCAGCCCTGTCCAATAC   |
| Batf3              | GAAGAAGCAGACCCAGAAGGCTGAC            | TGCGCAGCACAGAGTTCTCCTG    |
| Bcl6               | CCGTGAGCAGTTTAGAGCCCATAAG            | CCCTCAGGGCTGATTCAGGATC    |
| Cdyl               | TGGTTCGAATCAAGGAGCTGGC               | TCATATTGCAGCGCACCAGGG     |
| Cdyl2              | AACGACCAGCTTGAGAGCAGG                | TCACAGGGCTGTGCAGGTTTACG   |
| Ctbp2              | AAGCAGCAGCCACTGAGATCCG               | TGACCAAGGAGCTGAAGTCACGAAG |
| Dedd2              | TCACGACCTCCTGCCACATCTG               | TGGAAGAAGAGCTGGGATTGCC    |
| Dmrt1              | GAAGTGCAGCCTGATTGCGGAG               | CTTTTGACCAGGAGCTCGGCTG    |
| Dppa3              | TGTCGGTGCTGAAAGACCCTATAGC            | CACTGTCCCCTTCAAACCTCATTTC |
| Elf5               | TGACAGGATGACGTACGAGAAGCTG            | TTGTACACTAACCTCCGGTCAACCC |
| Eli2               | GGAGGAATCCCCTAATCGAAGCAC             | CGAGATGGCTTGAGGAGCTTTACG  |
| Ets1               | AGCCGACTCTCACCATCATCAAGAC            | TGCTCGGAGTTAACAGCGGGAC    |
| Etv1               | AGCTCATACTCCGAAACCTGACCG             | ACATAGGACGCCCTTCCCTTGG    |
| Etv5               | CTGAGCCGCTCTCTCCGCTATTAC             | AAGAGTGCATCCGGGTCACACAC   |
| Fbxo15             | AAACCAGCACAGCGAGAAGCG                | AATGCACACCAAGGTCACCGC     |
| Fgfbp1             | AGGATCCAGATGTGCTCAACCAGAG            | TGTCGCCTGTAACATGTTGAGGAAG |
| Fhl2               | TGAGGAGTGTGGAACACCCATCG              | GAAGCAGCCTTCATGCCAGTGC    |
| Fosl2              | AAGACCATCGGTACCACCGTGG               | TGTTTCTCTCCCTCCGGATTTCG   |
| Foxa1              | CAACGACTGGAACAGCTACTACGCG            | GCCGGAGTTCATGTTGCTGACAG   |
| Foxc1              | GCAGCCCAAGGACATGGTGAAG               | TGTCCGGGGCATTCTGGATG      |
| Foxg1              | CCCTCAACAAGTGCTTCGTGAAGG             | CGCGCTTAAAGGCCAGCTTG      |
| Foxl2              | Mm00843544_s1; TaqMan probe from ABI |                           |
| Foxn3              | GTCCGGCCGTTACCAATCACTC               | GTTGTGGTCCTCCTTCGGATCG    |
| Foxp3              | GTTTCGCCTACTTCAGAAACCACCC            | TCTCCACTCGCACAAAGCACTTG   |
| Gata2              | CCCCTAAGCAGAGAAGCAAGGCTC             | ATTGCACAGGTAGTGGCCCGTG    |
| Gbx2               | ATGCGGAAGACGGCAAAGCC                 | CCACCTTTGACTCGTCTTTCCCTTG |
| Grhl2              | GCAAAGCAAGTGACAGCCAAGAAG             | CTCAAATTGATCTGGGCTTCACTGG |
| Hesx1              | TCAGCTCCGGGAAAGCAAGC                 | TGAAGTCTCACTGGGAAGATCTGGG |
| Hmga2              | TCCACATCAGCCCAGGGACAAC               | TGGGTCTCCTCTGGGTCTCTTAGG  |
| Hnf4a              | AGGTCAAGCTACGAGGACAGCAGC             | CGAATGTCGCCATTGATCCCAG    |
| Hoxa2              | TTTATCAATAGCCAGCCGTCGCTC             | CGAGTGTGAAAGCGTCGAGG      |
| Hoxa9              | AAACAACCAGCGAAGGCGC                  | AGTTGGCAGCCGGGTTATTGG     |
| Hsf2bp             | AGAAACTGCACAGGCAGACAGTGG             | TGTTTTGCCTCATTTCAGCTGCTG  |
| Id3                | AGGAGCCTCTTAGCCTCTTGACG              | TAAGCTGAGTGCCTCGCGGG      |
| Inpp1l             | AGAGAGCCAGACCCACCAGATGAC             | AGGGGCAGAAATGCTGGTAGAGC   |
| Irf2               | TGGCTGGAGGAGCAGATAAATTCC             | TCCTTTTCCACGTCCCATCCG     |

|          |                           |                           |
|----------|---------------------------|---------------------------|
| Jarid1a  | CAACTTTGCCGAAGCGGTGAAC    | GTGAAAAGACACAATGGCGCCTG   |
| Jarid2   | GAAGCAGAAGTCTTGCCGTGGG    | CGTGTTTGCCAGACACTTTGCC    |
| Jmjd2c   | GCTCCTTCAGCAGAGACACATTTCC | TGGATGACTTCTCCCTCCGCAG    |
| Jun      | AAAGGAAGCTGGAGCGGATCG     | TTCCCTGAGCATGTTGGCCG      |
| Klf3     | TTTGATCCAGTCCCTGTCAAGCAG  | GCAACGGTGTGGAGTAAATGACCC  |
| Klf9     | GGGGAAACACGCCTCCGAAAAG    | TTTCCCCAGTGTGGGTCCGGTAGTG |
| Lass2    | ATTCTGCGTATGGCCACAAGTTC   | CAGTCTCCTCCCCCTCTGAACTCTC |
| Lhx2     | TACTACAACGGCGTGGGCACTGTGC | TGCGCATGCGCTTTGTCTTTTGG   |
| Mbd3     | GAATAAGAGTGCAGCAGCGTGTGC  | TGGATGCAGTCTGCCGTACAGG    |
| Meis2    | TCTTCGCCAAGCAGGTTTCGC     | ACAGCTAATGTACCGGTGGCAGAAG |
| Mettl5   | TGGATGGATTGCAAAAAGCCCAAG  | AACCGCTTTGTTTTCAATGTCATCG |
| Mkrn1    | AGTCCATACGGCGTAGTGTGCAAG  | AGGGATGGTTTTGCACTCAGATCAG |
| Nkx2-5   | ACCCAGCCAAAGACCCTCGG      | GACAGGTACCGCTGTTGCTTG     |
| Nr2f1    | CCTCAAGAAGTGCCTCAAAGTGGG  | TGGATTGGGCTGGGTTGGAG      |
| Nsbp1    | CGAATGCAACATGGAAAATGCTG   | CTGCTGCCACTGCTTCTTTCTTTTC |
| Nupr1    | ACCCTTCCAGCAACCTCTAAACC   | CAGCAGCTTCTCTTTGGTCCGAC   |
| Ostf1    | TGGAAGGGTTATGCAGACATTGTCC | TCCAAGGCCAGCTTCTTCTCATTG  |
| Otx1     | GGTGGCACTCAAGATCAACCTGC   | TTCCATTCCCGCTCTGCTGC      |
| Pdlim1   | AGCTGCCCATCTGTGACAAATGTG  | TTCAGGGTGGCGATGGTGATC     |
| Prickle1 | AGAGTATGCATGGGTCCCACCG    | GAACCTTTTCCTCTGGCAAGCATG  |
| Rest     | GAAACACCTGAGAAACCATTTCCCC | TGAATGAGTCCGCATGTGTTCGC   |
| Sap30    | GGAGACTCGCCTGTTCAAGACATC  | GGTCTGGTTGGAAGCTTGAAGTGTC |
| Sfrs6    | AAGCCATAGGCGCTCCTACTCTGG  | CTGCGACTCCTACTCCGAGACCTTC |
| Sirt3    | ATGCACGGTCTGTGCAAGGTCC    | TTCACAACGCCAGTACAGACAGGG  |
| Six1     | ACTGCTTTAAGGAGAAGTCTCGGGG | ATTGTTTTCGGTGTTCTCCCTTTCC |
| Smad6    | CCTATTCTCGGCTGTCTCCTCCTG  | TTGGTGGCCTCGGTTTCAGTG     |
| Sox11    | AAGAAGTGCGCCAAGCTCAAGG    | TCATCGTCGTCGTCCAGGAAGAC   |
| Sox15    | ACCCAAGGAGCAGAGGCTTTG     | AGGGGAGAAAGAGGGTCTTAGCTCC |
| Sox7     | ATGAGAGGAAACGTCTGGCAGTGC  | GTGTCAGCGCCTTCCATGACTTTC  |
| Stra13   | AGCTCATGGCGGAGTTCCTGAG    | CCACAACATCCAGGTCTTCTGCC   |
| Sub1     | TGTCAGTGTTCGGGACTTCAAAGG  | CCTTCAGCTGGCTCCATTGTTCC   |
| Tbx3     | CCTTCCACCTCCAACAACACG     | GTAAGGAAACAGGCTCCCGAAAGG  |
| Tbx5     | TTTGACCCACGTCTTCCCCG      | CCCGAAAGCCTTTGGCGAAG      |
| Tcfap2c  | CGCACTTGCTCCTACACGATCAGAC | TCACTGGGGTTCATGACCACTCC   |
| Tcfcp2l1 | ACAGAAGCAGGATGACAGTGGGG   | TCCAGGGTAGTCAGCTCTTCCAGG  |
| Tcf1     | CCAACCGCCTGTGGATCTGG      | CCTGGCGCAAGATCACCTGG      |
| Tgif1    | AAGAGAAAGCACTGCTGTCCCAGC  | TCTCAGCATGTCAGGAAGGAGCC   |
| Tgm2     | GCCACTTCATCCTGCTCTACAATGC | TATTCCCGTCGCTCCTCCTCTG    |
| Trpv2    | CCAAATCGGTTTGACCGTGACC    | CTCTAGCAGTCCAGTCAGCTCCTCG |
| Txlng    | TGAAATTGGCACAATGGAAGAAGC  | TTCCTGCTGCACTCTGAATCTTGC  |
| Ugp2     | GTGAATTCCTACAGTGCCCTTGG   | GGTCCAGTTCAGCATATCGGG     |
| Zfp57    | TGAGGACGTGGCAGTGTCTTTTAC  | CCCTGTGCAACTGGAGGACTTCTC  |
| Zic1     | CTGGCTGCGGCAAGGTTTTTTC    | CTCGCACTTGAAGGGCTTCTCC    |
| Zmat4    | GCACAGCTGATATCCGAGTCCCAG  | GGTGAAGCATGTAATACAGCCGGAC |

**Supplementary Table S2.** Response of gene expression 48hr after the induction of transcription factors in mouse ES cells. (Tab-delimited text file)

## Supplementary Methods

### Normalization of microarray data and detection of outliers

Two methods of array hybridizations were used in this study: (1) RNA extracted from cells with induced transcription factors (TFs) (cultured in Dox- conditions) and from controlled cells (cultured in Dox+ conditions) were Cy-3 labeled and all hybridized on separate arrays together with reference RNA labeled with Cy5; and (2) RNA extracted from cells with induced TFs (Dox-) were labeled with Cy3 and hybridized together with RNA from control cells (Dox+) which were labeled with Cy5. The second method does not use reference RNA. Data processing depended on the method of hybridization. Potential Cy3/Cy5 bias in microarrays with the hybridization of Dox- vs. Dox+ samples was removed by normalization to the median logratio of gene expression change in all TF-manipulation experiments.

Microarrays with Cy3-labeled sample RNA vs. Cy5-labeled reference RNA were processed as follows:

**Step 1:** Apply fixed cutoff=10 to all data (both Cy3 and Cy5): if( $x < 10$ ) then  $x = 10$ ;

**Step 2:** Log-transform data (Log10);

**Step 3:** Adjust to reference RNA (Cy5):  $Cy3(\text{adjusted}) = Cy3 - Cy5 + \text{average}(Cy5)$ ;

**Step 4:** Remove outliers. Each TF is now characterized by 4 values (4 arrays): control cells (Dox+) in 2 replications and cells with induced TFs (Dox-) in 2 replications, all are log-transformed (log10). To check if any of these values is an outlier, we first we estimate the average square difference (ASD) between replication pairs:

$$ASD = \text{SUM}[(x(i,1) - x(i,2))^2 + (y(i,1) - y(i,2))^2] / N/2$$

where  $x(i,j)$  and  $y(i,j)$  are the logintensities of Dox+ and Dox- cells, respectively, with induced  $i$ -th TF and replication  $j$ . Then we estimate the  $z$ -value for each TF:  $z = (x(i,1) - x(i,2)) / \text{sqrt}(ASD)$ . If  $\text{abs}(z) > 4$  then one of the Dox+ values is an outlier. The value that is farthe away from the median Dox+ value is considered an outlier and it is replaced with the value from another replication. Similarly, we remove outliers for Dox- samples: estimate  $z = (y(i,1) - y(i,2)) / \text{sqrt}(ASD)$ , where  $y(i,j) = \text{logintensity}$  of Dox- cells with induced TF= $i$  and replication= $j$ . If  $\text{abs}(z) > 4$  then one of the Dox- values is an outlier. The value that is farther away from the average Dox+ value for the same clone is considered an outlier and it is replaced with the value from another replication. If Dox- replications deviate from the average Dox+ value in different directions, then we assume no change in the expression of this gene.

**Step 5:** Adjust for gene expression variability in various transgenic clones. The main idea is that if the ES clone has an aberrant expression of gene  $i$  in Dox+ (i.e., without TF induction) and in Dox- (after TF induction) the expression returns closer to normal, then this change is not viewed as an effect of TF induction. First we estimate the significance of deviation of average expression in Dox+ from the median:

$$z = (\text{average}(\text{Dox+}) - \text{median}(\text{Dox+})) / SD,$$

where SD is standard deviation for average(Dox+) values estimated for all manipulated TFs.

If  $\text{abs}(z) > 2$  then do the following:

$$\text{if}(\text{average}(\text{Dox+}) > \text{median} \ \&\& \ \text{average}(\text{Dox-}) < \text{average}(\text{Dox+})) \{ \\ \text{average}(\text{Dox+}) = \text{median} + 2 * SD;$$

```

if(average(Dox-) > median+2*SD){
    average(Dox-) = $median+2*SD;
}
}else if(average(Dox+) < median && average(Dox-) > average(Dox+)){
    average(Dox+) = median-2*SD;
    if(average(Dox-) < median-2*SD){
        average(Dox-) = $median-2*SD;
    }
}
}

```

where “median” = median expression of gene for all cell lines in Dox+ conditions.

This method of data processing was used to re-analyze microarrays from our previous study (Nishiyama et al. 2009), as well as for 7 new TFs (Ctbp2, Etv5, Jarid2, Jmjd2c, Mett15, Tbx3, Tcf1). Statistics of data correction: 0.223% values were outliers, 0.930% values were adjusted for clone variability.

Microarrays without reference RNA (where RNA from cells cultured in Dox+ and Dox- conditions were labeled with Cy5 and Cy3, respectively, and hybridized on the same array) may potentially show more variability because data cannot be globally normalized using a reference as a yardstick. But these data can be normalized by the quantile method which is usually applied to single-dye microarrays. To take advantage of the competitive hybridization of RNA from cells in Dox- vs. Dox+ conditions here we also used a direct Cy3/Cy5 logratio as an alternative method. Finally, we compared the logratio from direct Cy3/Cy5 comparison and from quantile-normalized data, and then selected the value that was closer to zero. This is a conservative approach based on the assumption that true changes in gene expression should be detectable with both methods. Another specific feature of these data is a potential dye-related bias. To remove the bias, we used the median logratio from quantile-normalized data (Cy3/Cy5) and added this value to all Cy5 log-intensities. Below is the detailed description of the procedure:

**Step 1:** Log-transform all data (Log10)

**Step 2:** Use quantile normalization separately to Cy3 and Cy5 channels of each microarray. To make normalization smooth we approximate the cumulative probability distribution with piece-linear functions with 20 quantile nodes.

**Step 3:** Dye bias adjustment: estimate median logratio from quantile-normalized data (Cy3/Cy5) and add this value to all Cy5 log-intensities.

**Step 4:** Apply fixed cutoff=1 to all log-transformed data (it is equivalent to cutoff=10 for not log-transformed values).

**Step 5:** Remove outliers. Each TF is now characterized by 4 quantile-normalized values from 2 arrays:  $y_1$  = Dox- (Cy3) and  $x_1$  = Dox+ (Cy5) for the first replication and  $y_2$  = Dox- (Cy3) and  $x_2$  = Dox+ (Cy5) for the second replication, all are log-transformed (log10). First, to check if any of Dox+ values is an outlier we estimate z-value:  $z = (x_1 - x_2) / \sqrt{\text{ASD}}$ , where ASD = average square difference (ASD) between replication pairs:

$$\text{ASD} = \text{SUM}[(x_1 - x_2)^2 + (y_1 - y_2)^2] / N / 2.$$

If  $\text{abs}(z) > 4$  then one of the Dox+ values is an outlier. The Dox+ value that is farther away from the median Dox+ value for all TFs is considered an outlier and it is replaced with the value from another replication together with corresponding Dox- value. Because samples from Dox+ and Dox- conditions are hybridized to the same array, any problem with one color channel (Cy3 or Cy5) interferes with another color channel. Thus, we always replace both values for the outlier feature in the array. Second, to check if any of the Dox- values is an outlier, we estimate  $z = (y_1 - y_2) / \sqrt{\text{ASD}}$ . If  $\text{abs}(z) > 4$ , then we consider

the array with a higher logratio as the outlier, and if logratios have different signs, then both replications are discarded:

```

If ((y1-x1)*(y2-x2) < 0){
    Discard both replications. Logratio = 0.
}else if (abs(y1-x1) > abs(y2-x2)){
    Values (x1,y1) are replaced by (x2,y2). Logratio = y2 - x2.
}else if (abs(y2-x2) > abs(y1-x1)){
    Values (x2,y2) are replaced by (x1,y1). Logratio = y1 - x1.
}

```

Discarding the higher absolute logratio value represents our conservative approach, according to which the change of gene expression after manipulation of TFs should be reproducible.

**Step 6:** Adjustment for gene expression variability in various transgenic clones (justification see above).

First we estimate the significance of deviation of average expression in Dox+ from the median:

$$z = (\text{average}(\text{Dox+}) - \text{median})/\text{SD},$$

where SD is standard deviation for average(Dox+) values estimated for all manipulated TFs, and “median” is the median expression for all cell lines in Dox+ conditions.

If  $|\text{abs}(z)| > 2$  then:

```

if(average(Dox+) > median && average(Dox-) < average(Dox+)){
    average(Dox+) = median+2*SD;
    if(average(Dox-) > median+2*SD){
        average(Dox-) = $median+2*SD;
    }
}else if(average(Dox+) < median && average(Dox-) > average(Dox+)){
    average(Dox+) = median-2*SD;
    if(average(Dox-) < median-2*SD){
        average(Dox-) = $median-2*SD;
    }
}

```

**Step 7:** Combine logratio estimated from quantile-normalized data and non-normalized data for each array. From two logratios (normalized and not normalized) we select the one that has smaller absolute values. If logratios have different signs, then the response of a gene is set to zero.

Statistics of data correction: 0.263% values were outliers, 0.842% values were adjusted for clone variability.
